# Supplementary material
Source: PubMed Central journal article supplement (PMC6675550)
Supplement: jciinsight-4-124716-s120.pdf [file jciinsight-4-124716-s120.pdf]

## SUPPLEMENTAL FIGURES AND TABLES LEGENDS

### Supplemental Figure 1. Controls for cellular senescence and exogenous modifications.

(A) Cells were considered presenescent (PRE) if, when subconfluent in 10% serum, the labeling index (L.I.) of >70% of cells incorporated BrdU over a 1 d interval and <5% stained for SA $\beta$ gal. Cells were considered senescent (SEN) if <10% of cells incorporated BrdU over a 1 d interval and >80% were SA- $\beta$ gal positive (1). Average and standard deviation around the mean are shown. Average % SA- $\beta$ gal and BrdU incorporation were calculated from values across all cell types per indicated conditions (see **Supplemental Table 1** for cell list). (B) Detection of p53 by immunofluorescence. Inactivation of p53 was achieved by stable over expression of genetic suppressor element GSE22 as previously described (2). Intracellular accumulation of p53 due to GSE22 expression indicates p53 inactivation. Loss of p53 was induced either before or after senescence (XRA or REP). Quantified p53-intensities per nuclei are provided (bar graphs on the right; averages). Normal fibroblasts can senesce without a functional p53 (3). (C) Immunofluorescence detection of p16<sup>INK4a</sup> and IL6 in WI-38 and IMR-90 cells expressing an shRNA against p16<sup>INK4a</sup> previously validated in (4). IL6 expression serves as control of SASP development. Normal fibroblasts can senesce without a functional p16 (5). (D) p16<sup>INK4a</sup> mRNA levels measured in presenescent and senescent cells (TaqMan assay). (E) 53BP1 foci were detected by immunofluorescence and scored as the number of cells with  $\geq 3$  foci, indicative of persistent DNA damage (6, 7) (ave  $\pm$  s.e.). (F) ATM mRNA levels measured in shATM-expressing cells. The shRNA against ATM was previously validated in (6). Normal fibroblasts can senesce without a functional ATM. (G) p21<sup>WAF1</sup> mRNA levels measured in presenescent and senescent cells (TaqMan assay). (H) Immunofluorescence detection of p16<sup>INK4a</sup> in WI-38 and IMR-90 cells expressing ectopic p16<sup>INK4a</sup>.

### Supplemental Figure 2. NKG2D-ligands expression in senescent fibroblasts and epithelial cells.

(A) Time course of cell surface expression of NKG2D-Ls (top immunofluorescence panels) and intracellular IL7 (bottom immunofluorescence panels) in WI-38 cells after XRA (10 Gy). Bottom graphs show levels of secreted factors at specific times after senescence induction, measured by antibody array. Secreted factors are color-coded as shown on the left. X indicates p53 deficient status; O indicates oncogenic RAS (HRAS(G12V)) expression;  $\Delta$  indicates p53-deficient status and subsequent oncogenic RAS expression. We provide SASP factors known to impact innate immune responses (ILs, CXCLs, CCLs, CSFs).

(B) NKG2D-Ls expression in immortalized breast epithelial cells (MCF10A) and prostate cancer cells (PC-3, BPH1, DU145) senesced with XRA (10 Gy), MIT/mitoxantrone, or ETO/etoposide.

**Supplemental Figure 3. Senescent cells are preferentially targeted by activated innate immune cytolytic cells via NKG2D/NKG2D-Ls detection and GRZB/PRF killing.** (A) Cytolysis of WI-38 cells measured by LDH release after co-culture with individual leukocyte populations that were either unactivated or pre-activated. (B) Percent survival (1-%LDH release) of fibroblasts incubated with a recombinant NKG2D coupled to an Fc fragment (rNKG2D/Fc) prior to initiation of 12h co-cultures with IL2 pre-activated primary NK cells or PBMCs. The increase in SnCs killing in rec.NKG2D/Fc treated cultures, indicates that SnCs display NKG2D-Ls at their cell surface, and that their selective expression and presentation of NKG2D-Ls at their cell surface promotes their killing. This can be used to mediate antibody-dependent cell-mediated cytotoxicity (ADCC; (8)) and enhance NK cells' cytotoxicity against SnCs. (C) Percent survival of human prostate cancer cells and immortalized mammary epithelial cells induced to senesce by radiation (10 Gy (XRA)), or chemotherapy (mitoxantrone (MIT), etoposide (ETO)), and co-cultured with IL2 pre-activated primary NK or PBMCs. LDH release was measured at 14-20h after co-culture. (D) Blocking NKG2D receptor increases survival of senescent cancer cells, i.e. NKG2D-Ls recognition limits their survival/persistence. (E) Survival of SnCs co-cultured with IL2 pre-activated PBMCs in presence of a blocking antibody against DNAM1. LDH release was measured at 16-18h after co-culture. IgG/M served as a control. Blocking DNAM1-mediated cytotoxicity only partially prevents killing of SnCs. (F) Survival assessed by cell number in direct co-cultures, and indirect co-cultures (using trans-wells culture plates), after 10days using unactivated, freshly isolated PBMCs. A 1:10 ratio of target fibroblasts/effector PBMCs was used. (G) Granzyme B (GRZB) levels measured by ELISA in media after 9days of co-culture of PBMCs with SnCs. (H) Levels of immune cytokines TNF $\alpha$  and IFN $\gamma$  were measured by ELISA in conditioned media collected after 7-9days of mono and co-cultures with PBMCs. Data from different fibroblasts (Wi-38, IMR-90, HCA2) were pooled. (I) Granzyme B (GRZB) levels after 10days in direct co-cultures with PBMCs and complemented with rec.NKG2D/Fc every 2days (dil. 1:100). Higher levels of GRZB release in the media of SEN(XRA) + PBMC cultures treated with rec.NKG2D/Fc indicates that expression of NKG2D-Ls mediate and promote the immune killing of SnCs. (J) Survival measured by LDH release to assess effects of perforin (PRF) inhibition by concanamycin A (ConA). Fibroblasts (WI-38, IMR-90, HCA2) and epithelial cancer cells (PC3) were co-cultured with activated ConA/mock pre-treated PBMCs and NKs.

**Supplemental Figure 4. Balance between MMPs and NKG2D-Ls determine the fate of SnCs.** (A) NKG2D-Ls (i) and MMPs (ii) mRNA levels 10 d after initiating control monocultures (naïve) or PBMC co-cultures (persistent). Data were calculated as percent normalized to GUS, then normalized to the fibroblast marker CD90. Expression of CD90, NKG2D-Ls and MMPs was either not detected or barely detectable in leukocytes (**Supplemental Table 2D**). (B) sMICA in media from fibroblasts (top; WI-38, IMR-90, HCA2) and epithelial cells (bottom; BPH1, RWPE1, PC3, DU145), detected by ELISA. n.d. = not detectable. (C) Survival assessed by LDH release in senescent prostate cancer cells treated with GM6001 prior to 10 h co-culture with IL2 pre-activated NK cells (Effector:Target ratio 1:4). Protease inhibitor treatment decreases the levels of immune persistence of SnCs.

**Supplemental Figure 5. RAS-induced senescence entails an exaggerated immune-evasive phenotype.** (A) Immunofluorescence of p16<sup>INK4a</sup> and IL6 in WI-38 (left) and IMR-90 (right) fibroblasts induced to senesce by oncogenic HRAS(G12V) expression. (B) Senescence-associated  $\beta$ -galactosidase activity (blue bars) and labeling index (red bars) in RAS SnCs. (C) Quantification of 53BP1 foci as in **Supplemental Figure 1E**. (D) Granzyme B (GRZB) levels measured by ELISA in media collected after 9 d co-culture of RAS SnCs with PBMCs. (E) MMP1, MMP3 and IL8 detected by immunofluorescence in p53-wild type, or p53-deficient, RAS WI-38 cells. (F) Secreted MMPs levels in media were determined by antibody arrays. Values were normalized for cell number per volume of medium, compared to PRE cells. (G-H) MICA and MICB levels were measured by ELISA in media from RAS-induced senescence in fibroblasts (WI-38, IMR-90, HCA2; panel (G)) and prostate cancer cells (BPH1, RWPE1; panel (H)). (I) Percent survival of SEN (RAS) and SEN (p53-deficient RAS) cells treated with GM6001 prior to 10-12 h co-culture with IL2 pre-activated NK cells (Effector:Target ratio 1:10). GM6001 treatment increases the immune clearance of RAS SnCs by up to 20% compared to baseline.

**Supplemental Figure 6. Gene expression profiles of prostate tumors from patients treated or not with genotoxic therapy (mitoxantrone).** (A) Expression of senescence-associated markers in tumors after mitoxantrone therapy. Schematic of patient treatment and collection of residual tumor after chemotherapy regimen is shown (left). Heatmap of unsupervised hierarchical clustering of expression profiles show mRNA levels of senescence-associated cell cycle arrest markers (p16<sup>INK4a</sup>, p21<sup>WAF1</sup>, PCNA, MCM3, cyclin A, Ki-67) and SASP factors (IL6, IL7, IL8/CXCL8, GRO $\alpha$ /CXCL1, MCP2/CCL8, GM-CSF/CSF2, IL1 $\beta$ ) measured in the individual patients' paired prostate cancer tissue before and after mitoxantrone

chemotherapy. **(B)** mRNA levels of NK/T-cells markers CD94 and CD8. Expression was measured by qRT-PCR in paired prostate cancer tissues before and after chemotherapy. **(C)** Quantification of CD57 (+) cells (NK cell marker) by immunohistochemistry on untreated and mitoxantrone-treated cancer tissues Tissue microarray (TMA) of unpaired tissue cases were used (same sets as in main **Figure 7B**). **(D)** Expression profiles for each patient (#1-10) paired tumor set. Expression profiles for NKG2D-Ls, MMPs and NKG2D are shown in the 3 bar graphs. Expression was normalized to pretreatment values for each gene and patient.

**Supplemental Figure 7. Gene expression profiles of breast tumors from patients treated or not with either genotoxic/DNA-damaging therapy or targeted/endocrine therapy.** **(A)** Analysis of microarray data from studies GSE23988, GSE20194 and E-TABM-43 (9-11), combined without batch effects. The comparison of 339 untreated patients (No Tx) to 37 patients treated with epirubicin/cyclophosphamide (EPR/CTX) is shown as a differential gene expression heatmap (higher in EPR/CTX than in untreated in red; lower in EPR/CTX than in untreated in green). FDR corrected p-values are displayed on a grey-scale. Probe sets for Affymetrix platforms and Entrez IDs are provided in **Supplemental Table 3B**. Change in expression levels for MMPs, NKG2D-Ls, NKG2D, NK/T cell markers (CD8/94/57/56), and senescence-associated growth arrest markers (p16, p21, cyclin A, PCNA, MCM3, Ki-67) are shown. **(B-C)** Analysis of microarray data from studies GSE16391, GSE13787, GSE22035 and GSE1446 (12-15), combined without batch effects. The comparison of 186 untreated patients to 55 patients treated with targeted therapy tamoxifen/letrozole (TMX/LET) is shown as a heatmap in **(B)** and box plots in **(C)**. Affymetrix U133 plus 2.0 was used (probe sets for ULBP-3 and ULBP-4 were available and are included). Each box plot displays: the median (horizontal red line), first to third quartile range (Q1 to Q3, or interquartile range (IQR); blue box), minimum to maximum (dashed lines), outliers (red dots).

**Supplemental Figure 8. Gene expression profile of human nevi and normal skin.** **(A)** Box plots showing expression of 24 genes in normal skin and nevi. In each panel, the left box displays the distribution of expression across the 7 normal skin samples, while the right box displays the distribution of the expression across 18 nevi samples. Each box plot displays: the median (horizontal red line), first to third quartile range (Q1 to Q3, or interquartile range (IQR); blue box), minimum to maximum (dashed lines), outliers (red dots). **(B)** Heatmap of median level of expression of indicated genes in normal skin (baseline) and nevi (green-to-white-to-red color scale indicates expression levels lower-to-equal-to-higher compared to normal skin

expression levels). FDR p-values are displayed above each box plot in panel (A) or as a grey-scale on the right of the differential expression color-coded heatmap in panel (B). To ease comparisons of data between **Supplemental Figures 7 and 8**, we show results from the same probe set across the different platforms and studies.

**Supplemental Table 1. Fibroblasts and epithelial cells used in this study.** Normal human fibroblasts (WI-38, IMR-90, HCA2), and human epithelial cells of prostate (PC-3, DU145, BPH1, RWPE1) and mammary gland (MCF10A) origins, were cultured in 3% oxygen as described (16). Cells were induced to senesce by ionizing radiation (10 Gy X-ray), or DNA damaging agent treatment (mitoxantrone, or etoposide), or expression of oncogenic HRAS(G12V), p16<sup>INK4a</sup> or p21<sup>CIP1/WAF1</sup>, and were fully senescent 10 to 12 d later (see **Supplemental Figure 1A**). Alternatively, normal fibroblasts were repeatedly sub-cultured until proliferation ceased (telomere shortening leading to replicative senescence, REP). To express p16<sup>INK4a</sup>, p21<sup>CIP1/WAF1</sup>, HRAS(G12V), shp16, shATM or GSE22 (peptide suppressor of p53 activity), cells were transduced with lentiviruses carrying no insert or GFP (control), or the indicated cDNAs or shRNA control (non-functional shRNA), as described (4, 6, 16). PC-3 and DU145 are prostate carcinoma cells, BPH1 is a benign, immortalized (SV40 large T) prostatic hyperplastic epithelial line (17), and RWPE1 are non-malignant, immortalized (HPV-18 E7) cells from normal prostate tissue (18). MCF10A are non-transformed mammary epithelial cells. Symbols: p53<sup>-</sup> (lenti-GSE overexpression (GSE22)(2)); p16<sup>INK4a+</sup> or p21<sup>+</sup> (lenti-p16 or p21 overexpression); \* = total number of independent cell cultures used in the study; \*\* = subset of representative, independent cell culture experiments (annotated in parenthesis) used to compile senescence-associated characteristics (LI, SA-βGAL); \*\*\* = lenti- GSE, shp16, shATM, p16, p21, and HRAS(G12V) were defined and used as described previously (4, 6, 16); GSE expression induces p53 dysfunction; \*\*\*\* = not exogenously damaged; nt = not tested; na = not applicable (e.g. HCA2 are fibroblasts that require a functional p53 in order to senesce). Other notes: HCA2 are fibroblasts that senesce without significantly elevating p16 expression (4).

**Supplemental Table 2. Gene expression profiles in presenescent and senescent cells.** Average mRNA levels measured by TaqMan and normalized to GUS expression. Cell types, genetic modifications and treatments, culture conditions (3% or 20% O<sub>2</sub>), and number of independent biological extracts/samples (n) tested in at least quadruplicate quantitative RT-PCR runs per individual sample and gene probe set, are indicated on the left. Gene names are listed at the top. Genes other than NKG2D-Ls and MMPs serve as control and/or additional reference

for comparison, to highlight the specificity of the functions of NKG2D-Ls and MMPs across different senescence modalities. **(A)** Cell surface ligands: NKG2D-Ls (MICA/B, ULBP-1/2/3), DNAM1-Ls (CD112, CD155), HLA-C/E. **(B)** Senescence-associated growth arrest and tumor suppressors p16, p21, p53 and additional control genes (GAPDH, H1A). **(C)** Extracellular matrix metallo-protease genes MMP1, MMP3, MMP10, MMP12, MMP8, MMP13, and other proteases: Erp5/PDIA6, ADAM17, MT1-MMP/MMP14, PSEN1. Collectively, results from panels **(A,B,C)** represent data from 1,600 different biological samples gene expression data points derived from >6,500 TaqMan assay readouts. **(D)** Expression of fibroblast-specific marker CD90 and key genes (MICA/B, ULBP-1/2/3, MMP-1/3), were compared between monocultures of fibroblasts or PBMCs. nt = not tested; nd = not detectable. Results in (D) show that the values observed when measuring expression of NKG2D-Ls in experiments were both cell types (fibroblasts and PBMCs) are present, come essentially from the fibroblast population, and that PBMCs do not contribute to those values.

**Supplemental Table 3. Gene expression probes.** **(A)** Probes used in TaqMan assays (prostate tumor data; see main **Figures 1A, 7A-D** and **Supplemental Figure 6**). **(B)** Probes used for data mining expression arrays (breast cancer and nevi data; see main **Figures 1B-C, 7E-I** and **Supplemental Figures 7-8**).

**Supplemental Table 4. NIH/GEO accession numbers of the patient studies considered for analysis for breast cancer (A) and nevi (B).** Enumeration of studies selected for bias analysis and then remaining (highlighted) for gene expression analysis, and whose results are presented in **Figures 1B-C, 7E-I** and **Supplemental Figures 7-8**. Gene Expression Omnibus: <http://www.ncbi.nlm.nih.gov/geo/>. ArrayExpress: <http://www.ebi.ac.uk/arrayexpress/>

## REFERENCES

1. Dimri GP, et al. A biomarker that identifies senescent human cells in culture and in aging skin in vivo. *Proc Natl Acad Sci U S A*. 1995;92(20):9363-7.
2. Ossovskaya VS, et al. Use of genetic suppressor elements to dissect distinct biological effects of separate p53 domains. *Proc Natl Acad Sci U S A*. 1996;93(19):10309-14.
3. Beausejour CM, et al. Reversal of human cellular senescence: roles of the p53 and p16 pathways. *EMBO J*. 2003;22(16):4212-22.
4. Coppé JP, et al. Tumor Suppressor and Aging Biomarker p16INK4a Induces Cellular Senescence without the Associated Inflammatory Secretory Phenotype. *J Biol Chem*. 2011;286(42):36396-403.
5. Itahana K, et al. Control of the replicative life span of human fibroblasts by p16 and the polycomb protein Bmi-1. *Molecular and cellular biology*. 2003;23(1):389-401.
6. Rodier F, et al. Persistent DNA damage signaling triggers senescence-associated inflammatory cytokine secretion. *Nature Cell Biol*. 2009;11(9):73-9.
7. Rodier F, et al. DNA-SCARS: Distinct nuclear structures that sustain damage-induced senescence growth arrest and inflammatory cytokine secretion. *J Cell Sci*. 2011.
8. Kim KM, et al. Identification of senescent cell surface targetable protein DPP4. *Genes Dev*. 2017;31(15):1529-34.
9. Iwamoto T, et al. Gene pathways associated with prognosis and chemotherapy sensitivity in molecular subtypes of breast cancer. *J Natl Cancer Inst*. 2011;103(3):264-72.
10. Popovici V, et al. Effect of training-sample size and classification difficulty on the accuracy of genomic predictors. *Breast Cancer Res*. 2010;12(1):R5.
11. Bertheau P, et al. Exquisite sensitivity of TP53 mutant and basal breast cancers to a dose-dense epirubicin-cyclophosphamide regimen. *PLoS Med*. 2007;4(3):e90.
12. Cizkova M, et al. Gene expression profiling reveals new aspects of PIK3CA mutation in ERalpha-positive breast cancer: major implication of the Wnt signaling pathway. *PloS one*. 2010;5(12):e15647.
13. Desmedt C, et al. Multifactorial approach to predicting resistance to anthracyclines. *J Clin Oncol*. 2011;29(12):1578-86.
14. Desmedt C, et al. The Gene expression Grade Index: a potential predictor of relapse for endocrine-treated breast cancer patients in the BIG 1-98 trial. *BMC Med Genomics*. 2009;2(40).
15. Marty B, et al. Frequent PTEN genomic alterations and activated phosphatidylinositol 3-kinase pathway in basal-like breast cancer cells. *Breast Cancer Res*. 2008;10(6):R101.
16. Coppe JP, et al. Senescence-associated secretory phenotypes reveal cell-nonautonomous functions of oncogenic RAS and the p53 tumor suppressor. *PLoS Biol*. 2008;6(12):2853-68.
17. Hayward SW, et al. Establishment and characterization of an immortalized but non-transformed human prostate epithelial cell line: BPH-1. *In Vitro Cell Dev Biol Anim*. 1995;31(1):14-24.
18. Bello D, Webber MM, Kleinman HK, Wartinger DD, and Rhim JS. Androgen responsive adult human prostatic epithelial cell lines immortalized by human papillomavirus 18. *Carcinogenesis*. 1997;18(6):1215-23.

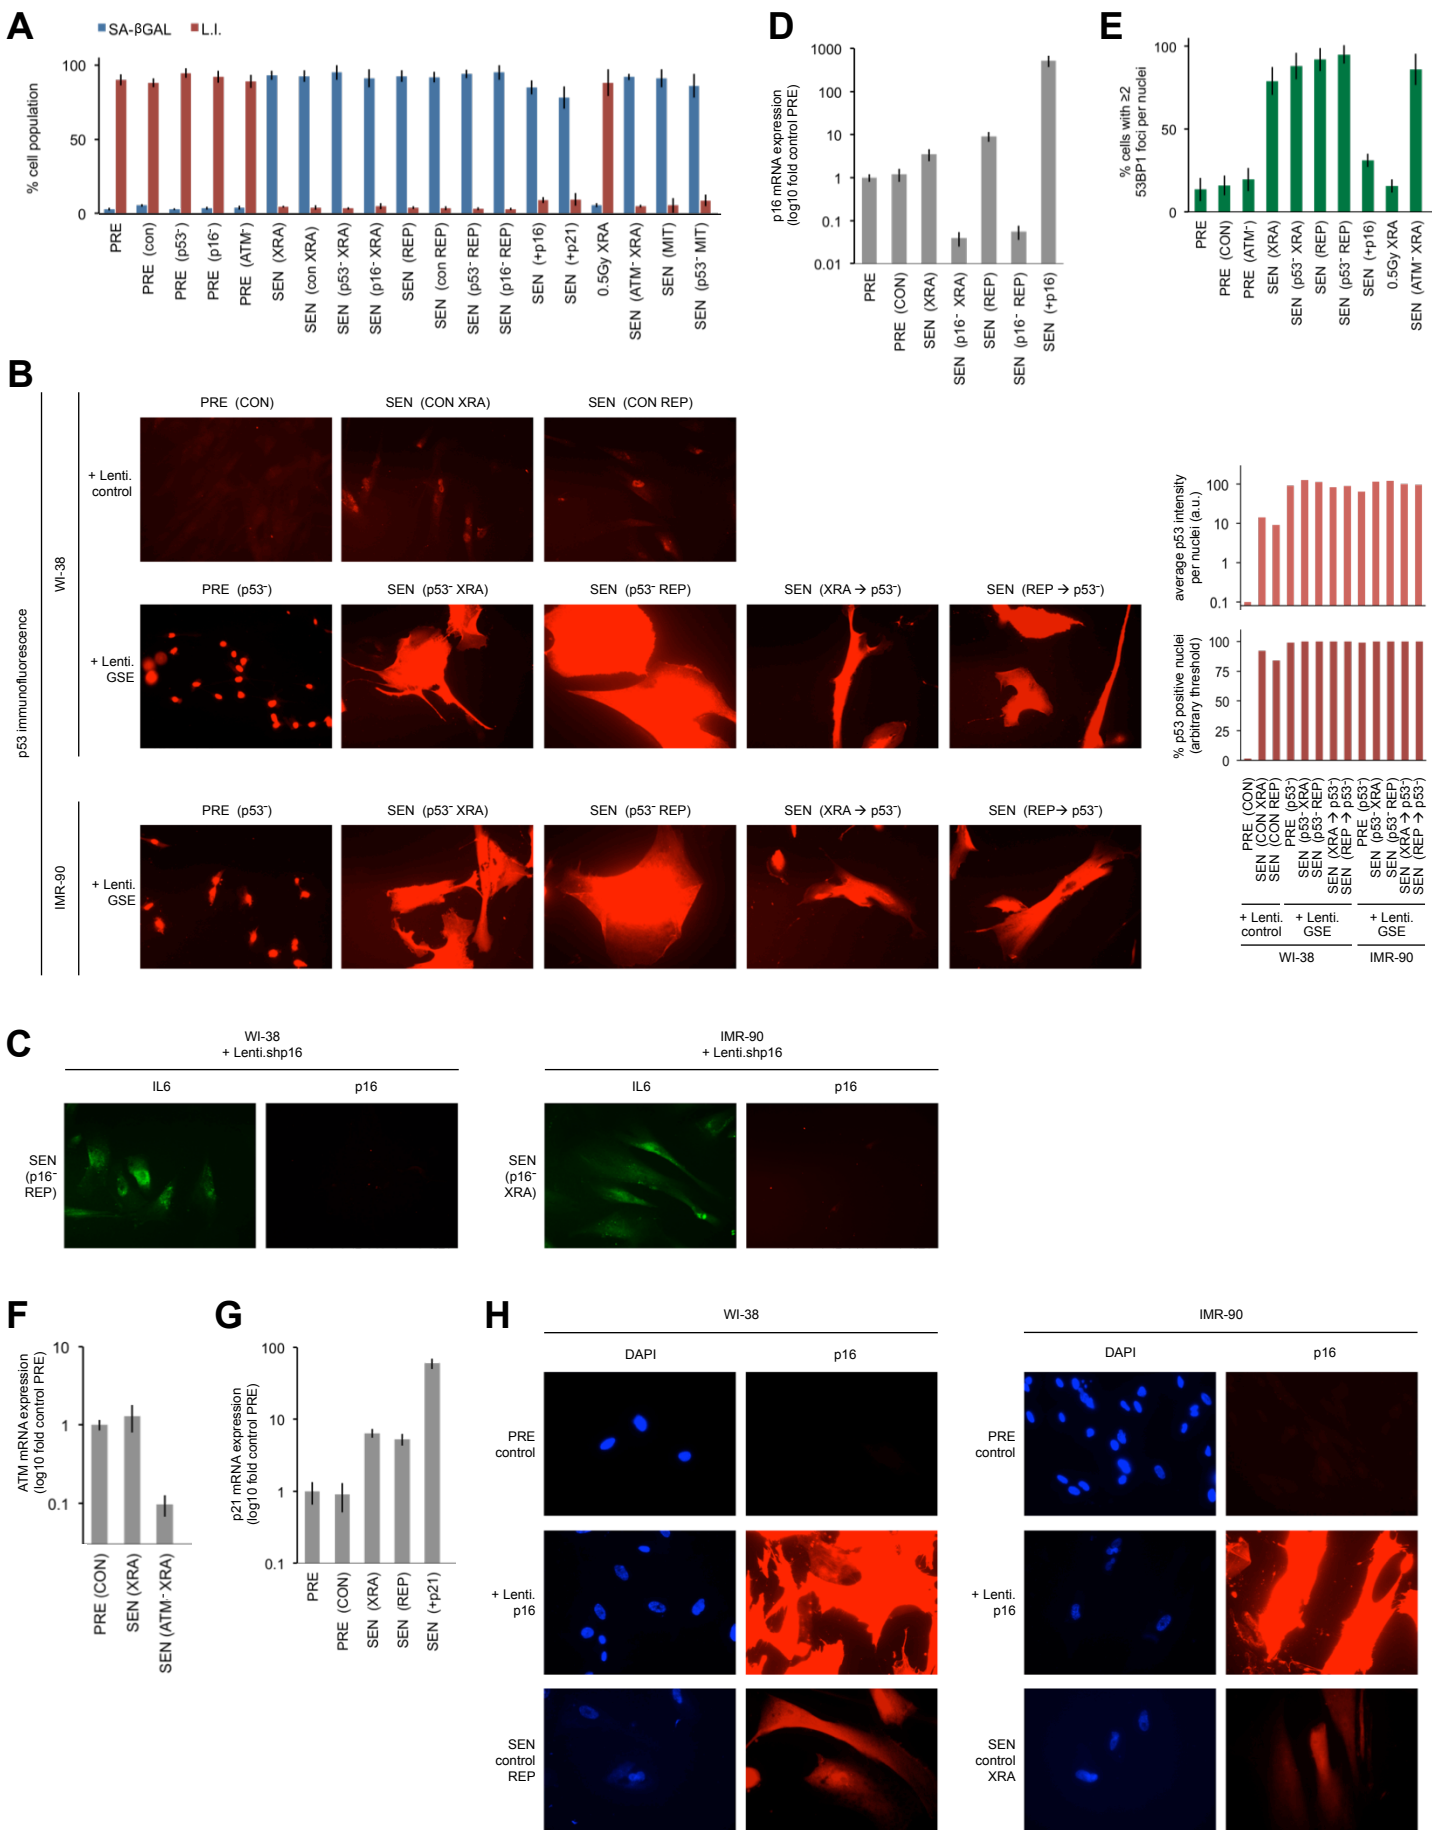

Supplemental Figure 1



**A**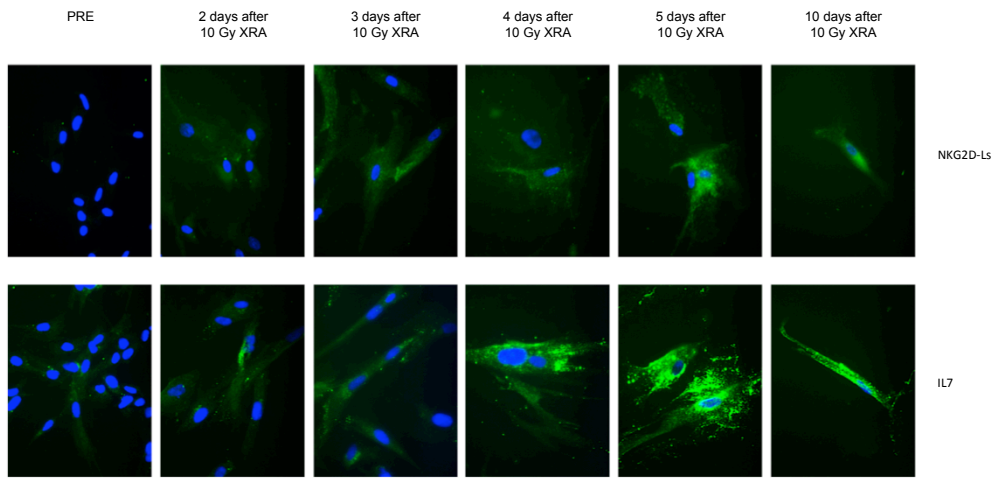

SASP features

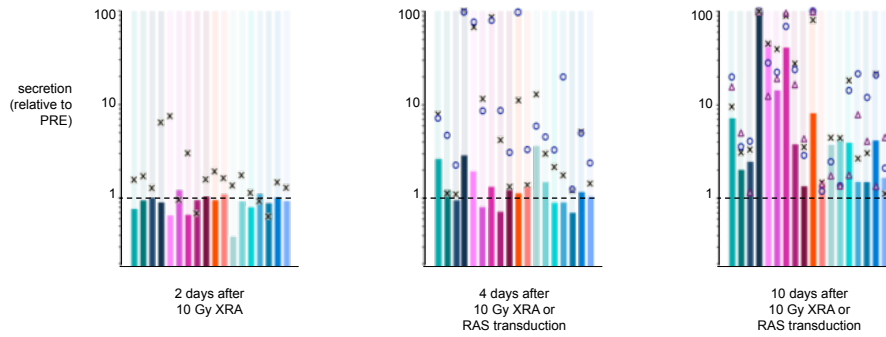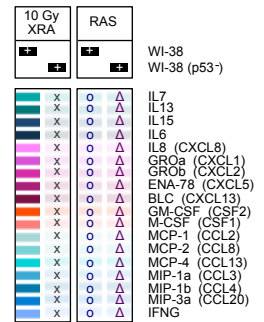**B**

| Fold change vs. PRE |           | MICA | MICB | ULBP1 | ULBP2 | ULBP3 |
|---------------------|-----------|------|------|-------|-------|-------|
| MCF10A              | PRE       | 1.0  | 1.0  | n.d.  | 1.0   | 1.0   |
|                     | SEN (XRA) | 4.9  | 2.5  | n.d.  | 3.0   | 0.8   |
|                     | SEN (ETO) | 3.4  | 1.6  | n.d.  | 2.7   | 0.2   |
| PC-3                | PRE       | 1.0  | 1.0  | 1.0   | 1.0   | 1.0   |
|                     | SEN (XRA) | 3.2  | 2.8  | 1.2   | 3.1   | n.d.  |
|                     | SEN (MIT) | 5.7  | 2.3  | n.d.  | 3.5   | 2.1   |
| BPH1                | PRE       | 1.0  | 1.0  | nt    | 1.0   | 1.0   |
|                     | SEN (XRA) | 9.5  | 8.3  | nt    | 1.8   | n.d.  |
|                     | SEN (MIT) | 11.3 | 6.7  | nt    | 3.5   | 1.4   |
| DU145               | PRE       | 1.0  | 1.0  | nt    | 1.0   | nt    |
|                     | SEN (XRA) | 2.8  | 1.7  | nt    | 2.4   | nt    |

n.t. = not tested  
n.d. = not detected

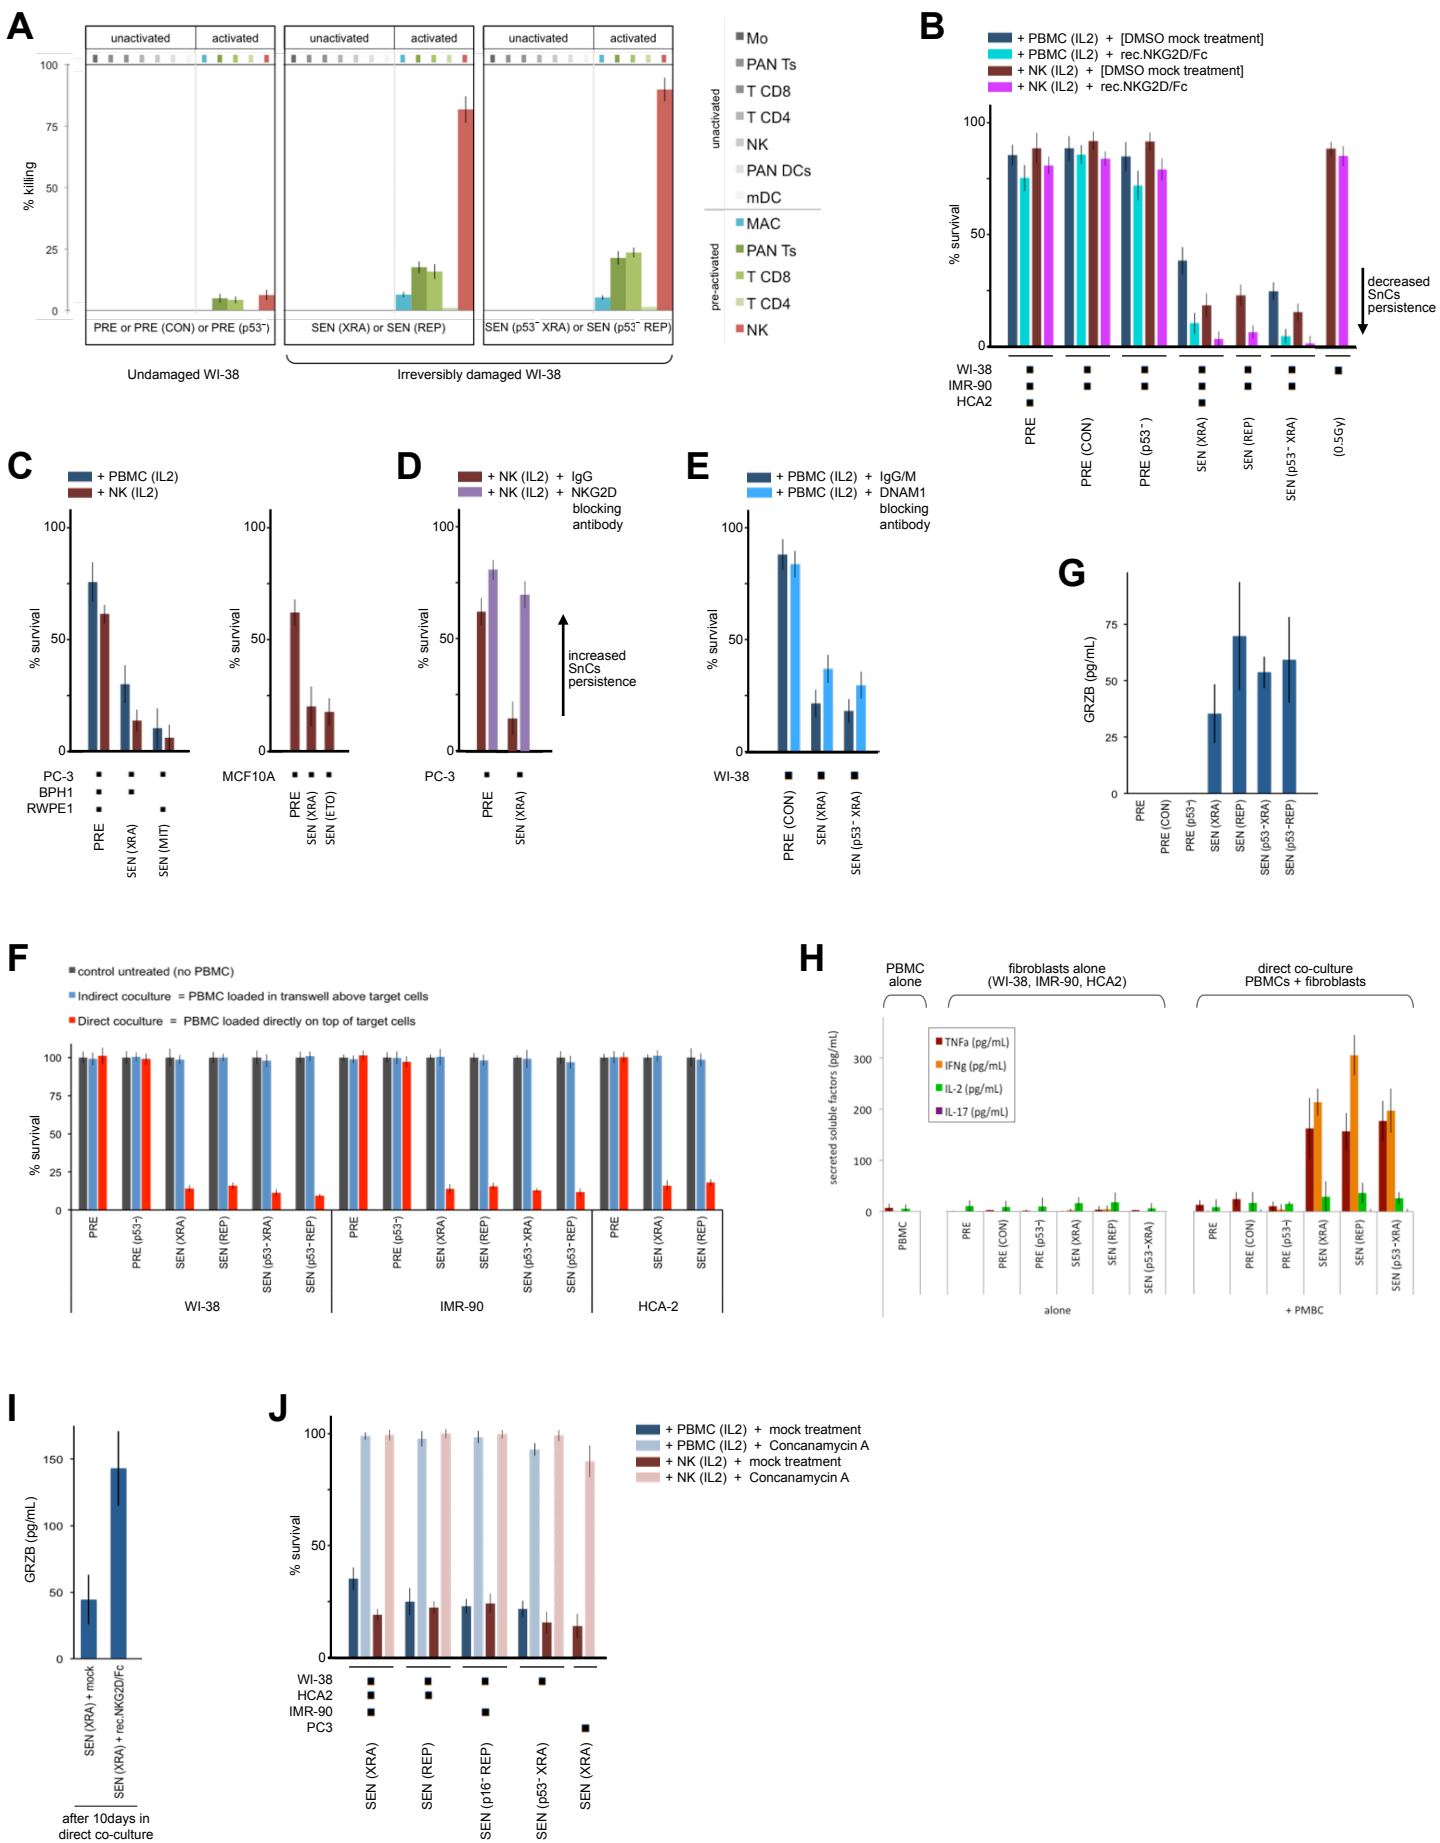

Supplemental Figure 3

**A**

| gene expression normalized to CD90 expression | SEN (XRA)                   |                   | SEN (p53-XRA)               |                   | SEN (REP)                   |                   | SEN (XRA)                    |                               |
|-----------------------------------------------|-----------------------------|-------------------|-----------------------------|-------------------|-----------------------------|-------------------|------------------------------|-------------------------------|
|                                               | naive (mock treated) @ +10d | after PBMC @ +10d | naive (mock treated) @ +10d | after PBMC @ +10d | naive (mock treated) @ +10d | after PBMC @ +10d | after 1 round of PBMC @ +10d | after 2 rounds of PBMC @ +20d |
| <b>MICA</b>                                   | 1.00                        | 3.37              | 1.00                        | 2.55              | 1.00                        | 2.04              | 1.00                         | 1.91                          |
| <b>MICB</b>                                   | 1.00                        | 24.54             | 1.00                        | 20.53             | 1.00                        | 52.21             | 1.00                         | 2.54                          |
| <b>ULBP1</b>                                  | 1.00                        | 0.83              | 1.00                        | 2.37              | 1.00                        | 0.67              | 1.00                         | 0.98                          |
| <b>ULBP2</b>                                  | 1.00                        | 2.12              | 1.00                        | 2.17              | 1.00                        | 2.66              | 1.00                         | 1.46                          |
| <b>ULBP3</b>                                  | 1.00                        | 3.25              | 1.00                        | 1.98              | 1.00                        | 2.37              | 1.00                         | 1.08                          |
| <b>MMP1</b>                                   | 1.00                        | 4.25              | 1.00                        | 7.06              | 1.00                        | 1.80              | 1.00                         | 5.60                          |
| <b>MMP3</b>                                   | 1.00                        | 14.17             | 1.00                        | >10,000           | 1.00                        | >10,000           | 1.00                         | 14.59                         |
| <b>MMP10</b>                                  | 1.00                        | 187.19            | 1.00                        | 105.77            | 1.00                        | 37.80             | 1.00                         | 65.18                         |
| <b>MMP12</b>                                  | 1.00                        | >10,000           | 1.00                        | 8092.96           | 1.00                        | 3181.20           | 1.00                         | 11.27                         |

**C**

|              |      |         |      |         |      |         |      |       |
|--------------|------|---------|------|---------|------|---------|------|-------|
| <b>MMP1</b>  | 1.00 | 4.25    | 1.00 | 7.06    | 1.00 | 1.80    | 1.00 | 5.60  |
| <b>MMP3</b>  | 1.00 | 14.17   | 1.00 | >10,000 | 1.00 | >10,000 | 1.00 | 14.59 |
| <b>MMP10</b> | 1.00 | 187.19  | 1.00 | 105.77  | 1.00 | 37.80   | 1.00 | 65.18 |
| <b>MMP12</b> | 1.00 | >10,000 | 1.00 | 8092.96 | 1.00 | 3181.20 | 1.00 | 11.27 |

**D**

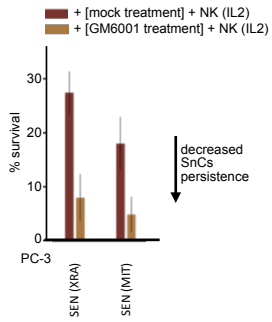

**B**

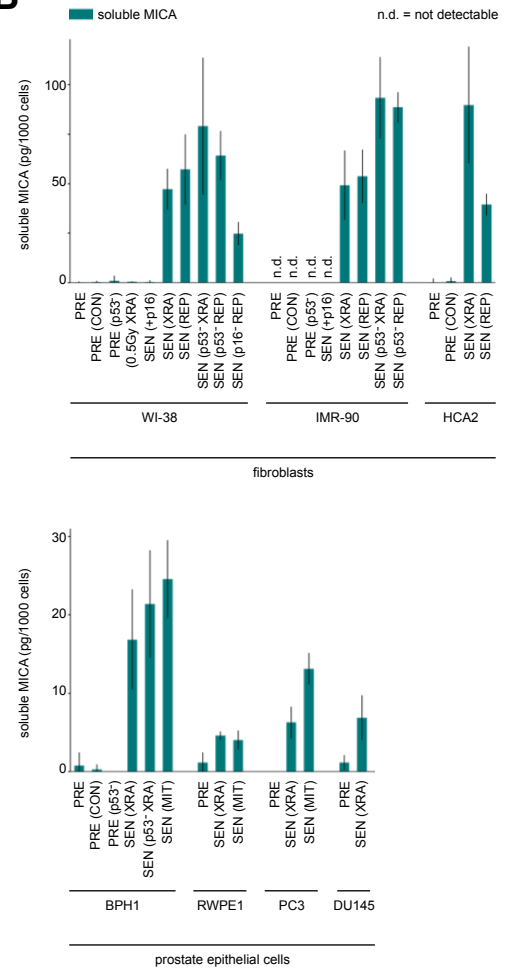

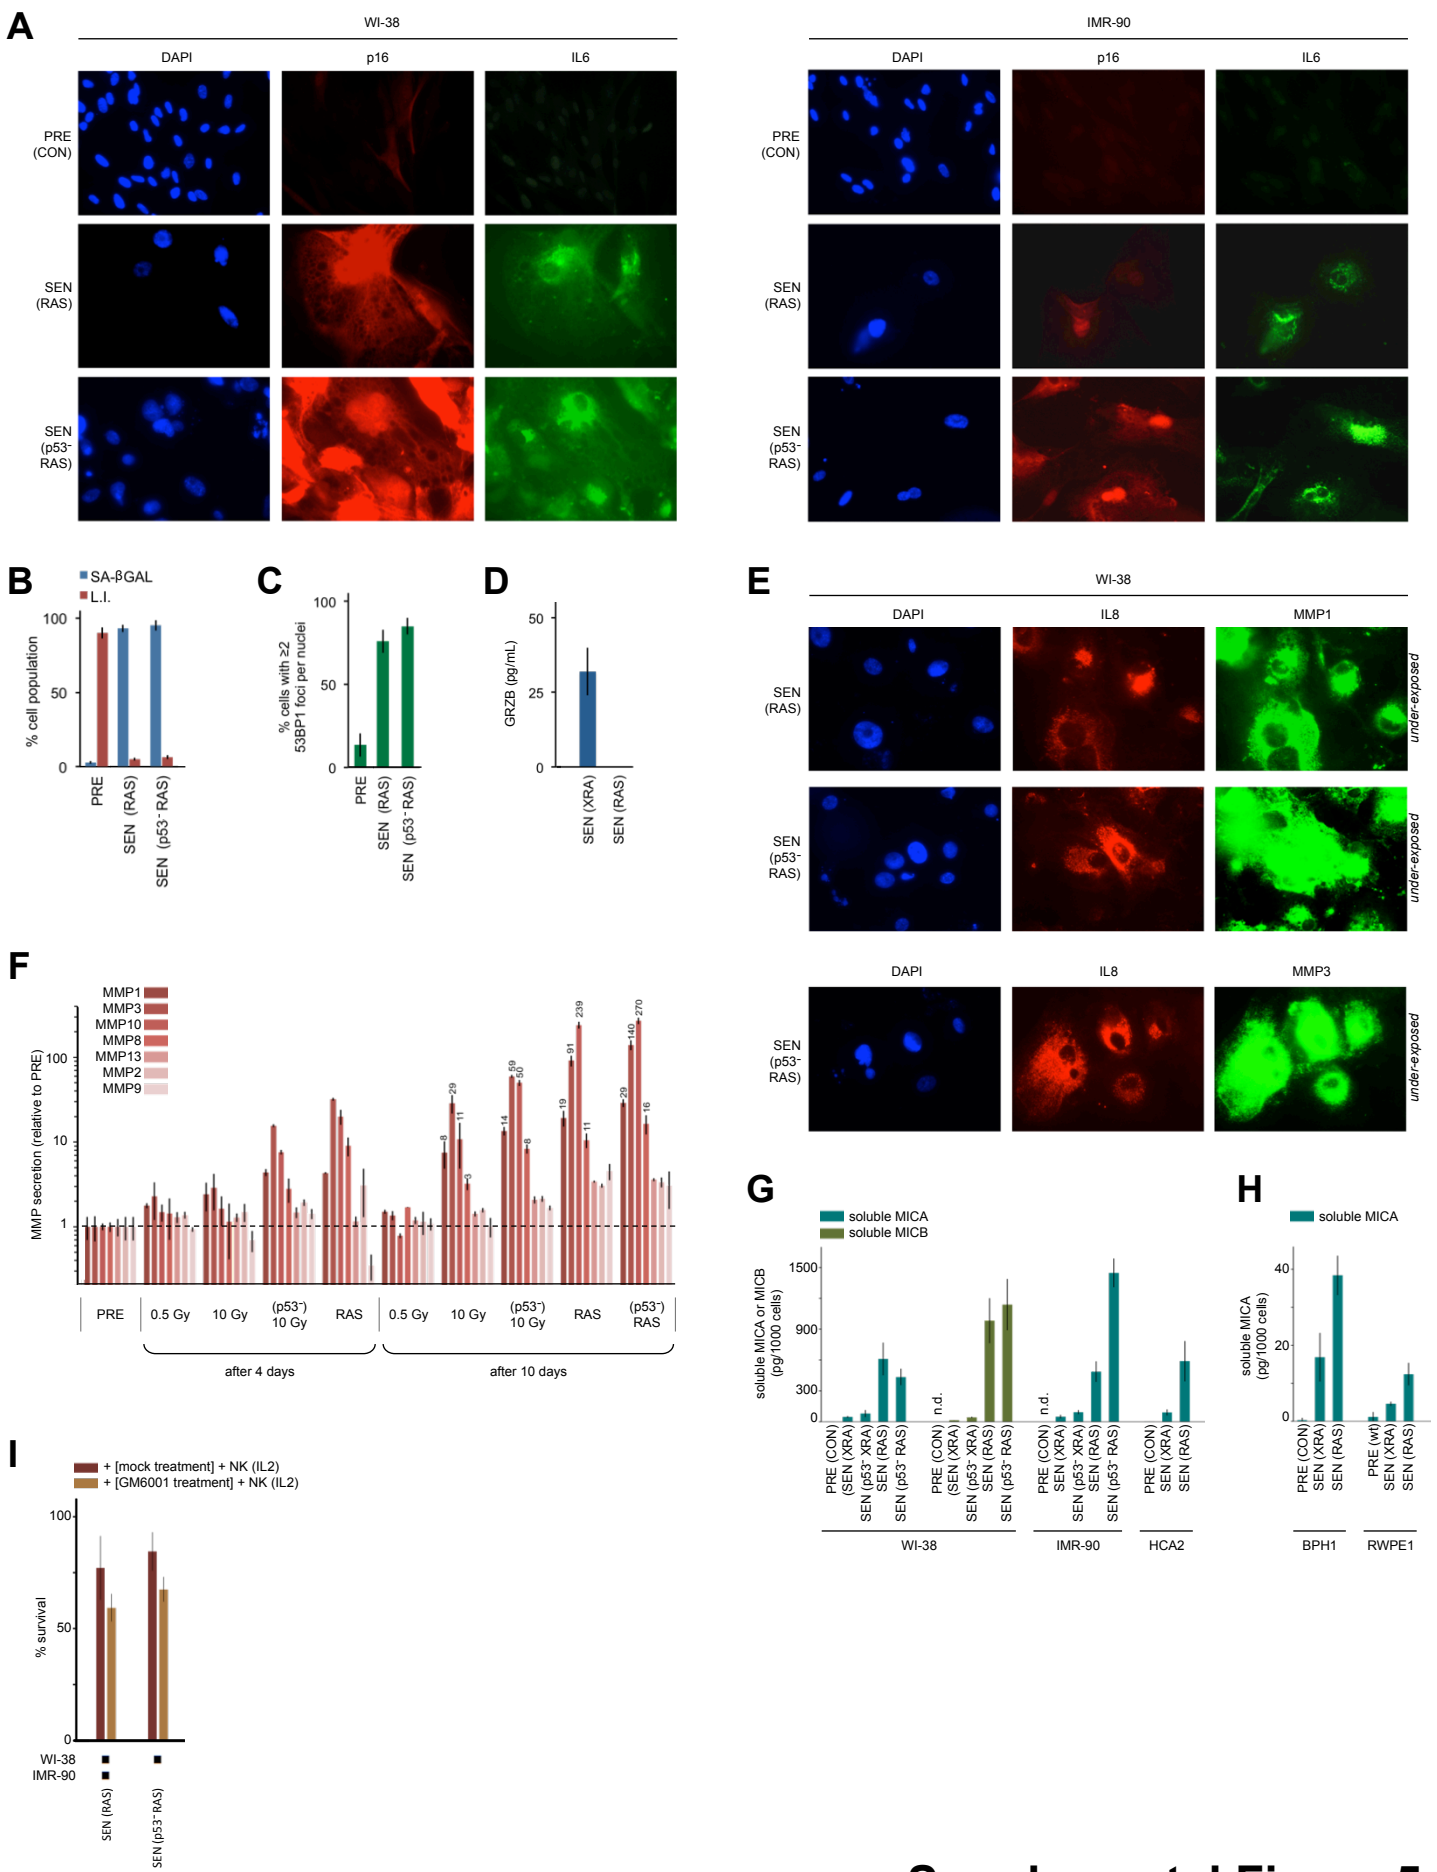

**A**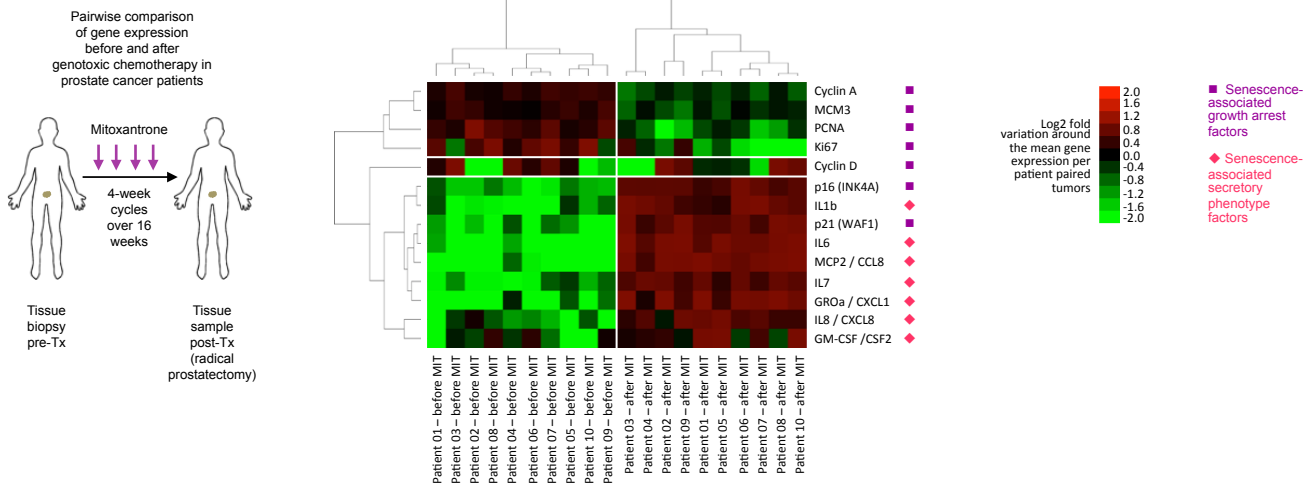**B**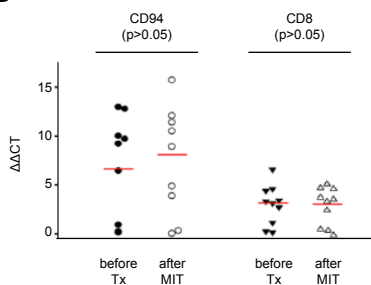**C**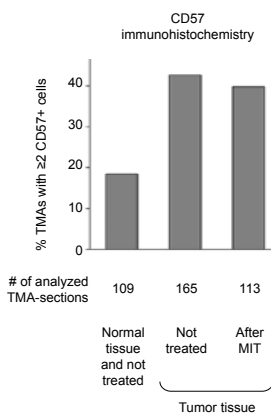**D**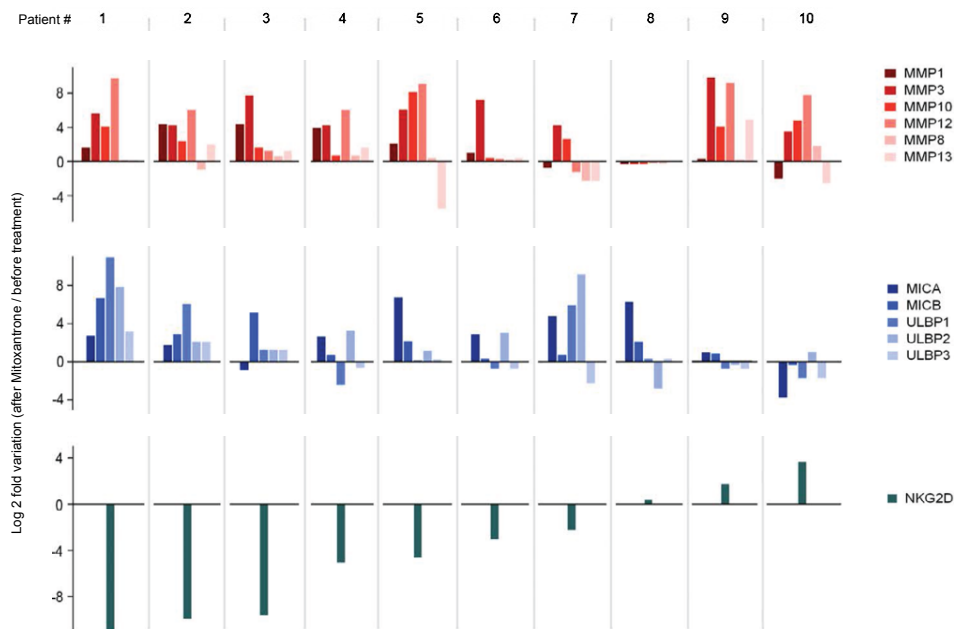

**A**

Breast cancer cohort of 376 patients

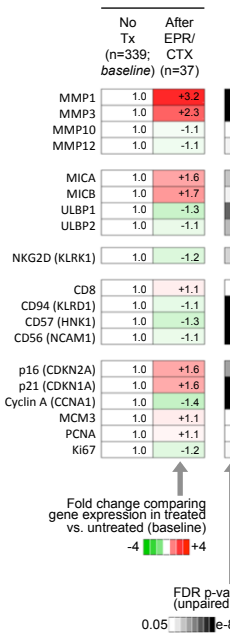**B**

Breast cancer cohort of 241 patients

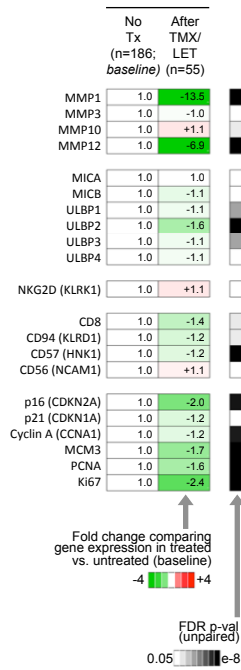**C**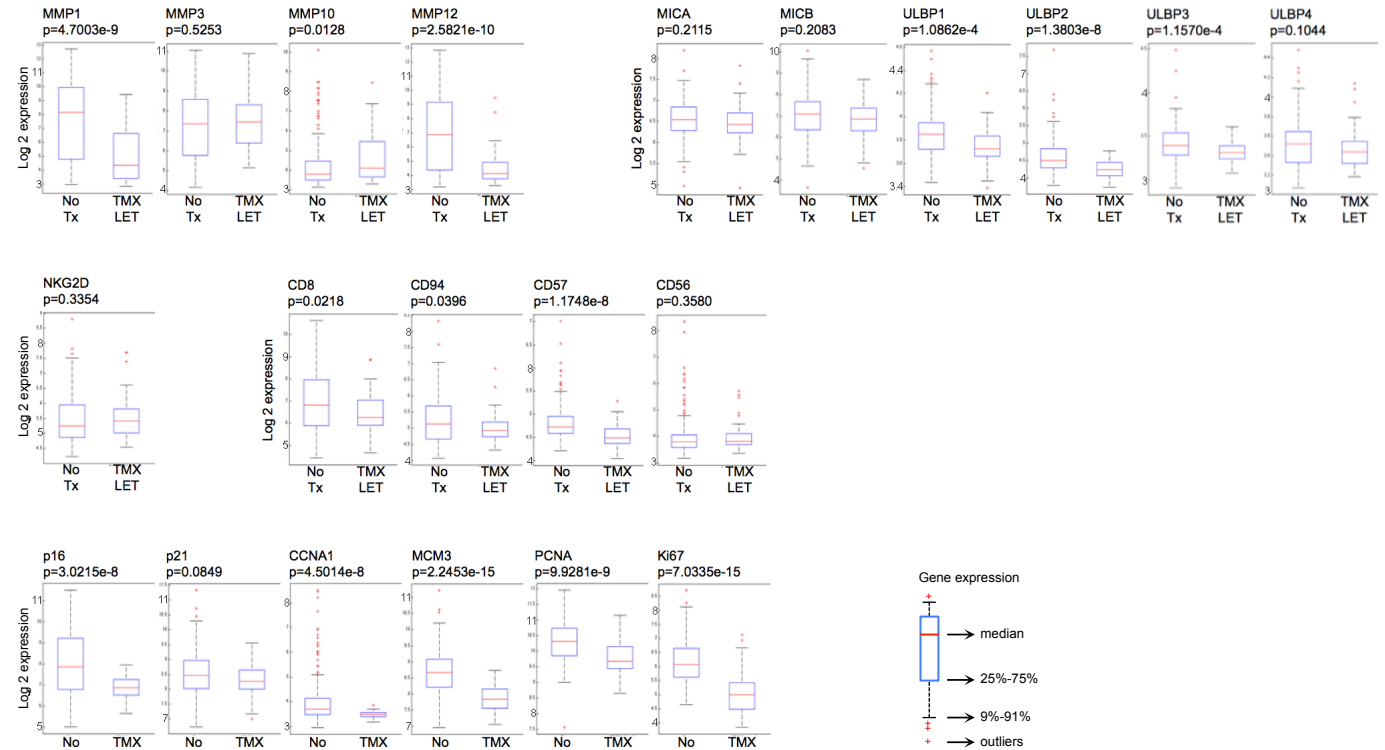

**A**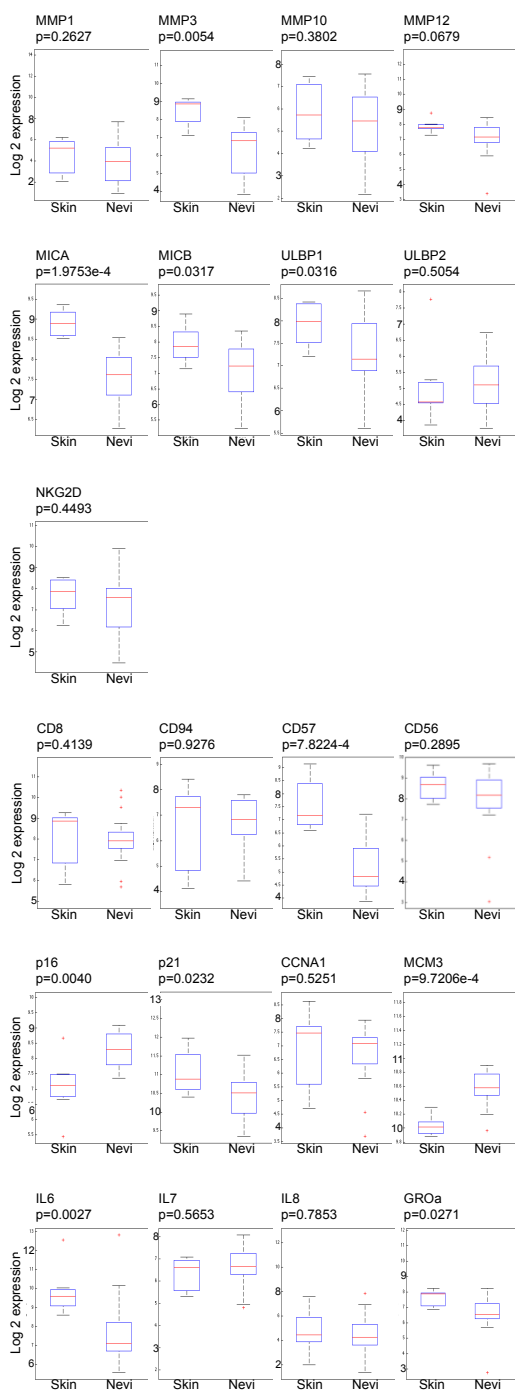**B**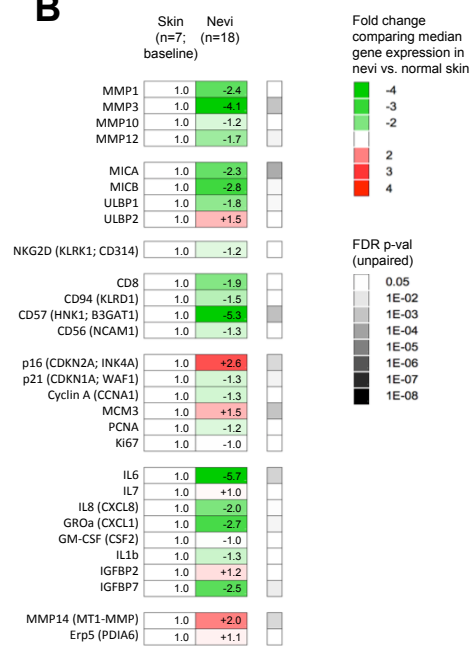

| designation name | phenotype    | genetic alteration                                                                      | treatment                                          | damage type           | n* (n**)         |                   |                 |
|------------------|--------------|-----------------------------------------------------------------------------------------|----------------------------------------------------|-----------------------|------------------|-------------------|-----------------|
|                  |              |                                                                                         |                                                    |                       | WI-38<br>(3% O2) | IMR-90<br>(3% O2) | HCA2<br>(3% O2) |
| PRE              | presenescent | wild type                                                                               | none                                               | undamaged             | 15 (2)           | 9 (1)             | 8 (1)           |
| PRE (CON)        | presenescent | control (i.e. lenti-GFP, or empty lenti-vector, or lenti-shCON)                         | none                                               | undamaged             | 11 (2)           | 5 (1)             | 4 (1)           |
| PRE (p53-)       | presenescent | lenti-GSE ***                                                                           | none                                               | undamaged             | 6 (1)            | 4 (1)             | na              |
| PRE (p16-)       | presenescent | lenti-shp16 ***                                                                         | none                                               | undamaged             | 2 (1)            | 2 (1)             | nt              |
| SEN (XRA)        | senescent    | wild type                                                                               | 10 Gy XRA; radiomimetic-induced senescence         | genomic damage        | 12 (3)           | 8 (1)             | 5 (1)           |
| SEN (CON XRA)    | senescent    | control (i.e. lenti-GFP, or empty lenti-vector, or lenti-shCON)                         | 10 Gy XRA; radiomimetic-induced senescence         | genomic damage        | 5 (1)            | 1 (1)             | 1 (0)           |
| SEN (p53- XRA)   | senescent    | lenti-GSE expression in PRE cells before X-ray-induced senescence                       | 10 Gy XRA; radiomimetic-induced senescence         | genomic damage        | 4 (2)            | 3 (1)             | na              |
| SEN (XRA > p53-) | senescent    | lenti-GSE expression in SEN cells after X-ray-induced senescence                        | 10 Gy XRA; radiomimetic-induced senescence         | genomic damage        | 2 (1)            | 2 (1)             | na              |
| SEN (p16- XRA)   | senescent    | lenti-shp16 expression in PRE cells before X-ray-induced senescence                     | 10 Gy XRA; radiomimetic-induced senescence         | genomic damage        | 2 (1)            | 2 (1)             | nt              |
| SEN (REP)        | senescent    | wild type                                                                               | replicative senescence                             | genomic damage        | 10 (2)           | 4 (2)             | 3 (1)           |
| SEN (CON REP)    | senescent    | control (i.e. lenti-GFP, or empty lenti-vector, or lenti-shCON)                         | replicative senescence                             | genomic damage        | 2 (1)            | 2 (1)             | nt              |
| SEN (p53- REP)   | senescent    | lenti-GSE expression in PRE cells before replicative senescence                         | replicative senescence                             | genomic damage        | 6 (1)            | 2 (1)             | na              |
| SEN (REP > p53-) | senescent    | lenti-GSE expression in SEN cells after replicative senescence                          | replicative senescence                             | genomic damage        | 2 (1)            | 2 (1)             | na              |
| SEN (p16- REP)   | senescent    | lenti-shp16 expression in PRE cells before replicative senescence                       | replicative senescence                             | genomic damage        | 2 (1)            | 2 (1)             | nt              |
| SEN (MIT)        | senescent    | mitoxantrone-induced senescence                                                         | chemotherapy-induced senescence                    | genomic damage        | 5 (1)            | 2 (1)             | nt              |
| SEN (p53- MIT)   | senescent    | lenti-GSE expression in PRE cells before Mitoxantrone-induced senescence                | chemotherapy-induced senescence                    | genomic damage        | 2 (1)            | nt                | na              |
| SEN (+p16)       | senescent    | lenti-p16 ***                                                                           | tumor suppressor overexpression-induced senescence | undamaged             | 3 (1)            | 2 (1)             | nt              |
| SEN (+p21)       | senescent    | lenti-p21 ***                                                                           | tumor suppressor overexpression-induced senescence | undamaged             | 1 (1)            | 1 (0)             | nt              |
| PRE (0.5Gy XRA)  | recovered    | wild type                                                                               | 0.5 Gy XRA-induced transient genomic damage        | recovered from damage | 3 (2)            | nt                | nt              |
| PRE (ATM-)       | presenescent | lenti-shATM ***                                                                         | none                                               | undamaged             | 3 (1)            | nt                | 2 (1)           |
| SEN (ATM- XRA)   | senescent    | lenti-shATM                                                                             | 10 Gy XRA; radiomimetic                            | genomic damage        | 3 (1)            | nt                | 2 (1)           |
| SEN (RAS)        | senescent    | lenti-HRAS(G12V) ***                                                                    | oncogene-induced senescence                        | oncogenic damage      | 6 (2)            | 4 (0)             | 3 (1)           |
| SEN (p53- RAS)   | senescent    | lenti-GSE expression in PRE cells before lenti-HRAS(G12V) expression-induced senescence | oncogene-induced senescence                        | oncogenic damage      | 3 (2)            | 2 (0)             | na              |

  

| designation name | phenotype    | genetic alteration              | treatment                                  | damage type      | PC3     | LNCaP   | RWPE1   | BPH1    |
|------------------|--------------|---------------------------------|--------------------------------------------|------------------|---------|---------|---------|---------|
|                  |              |                                 |                                            |                  | (3% O2) | (3% O2) | (3% O2) | (3% O2) |
| PRE              | presenescent | wild type                       | none                                       | undamaged ****   | 4 (2)   | 2 (1)   | 2 (1)   | 2 (1)   |
| SEN (XRA)        | senescent    | wild type                       | 10 Gy XRA; radiomimetic-induced senescence | genomic damage   | 4 (2)   | 2 (1)   | 2 (1)   | 2 (1)   |
| SEN (MIT)        | senescent    | mitoxantrone-induced senescence | chemotherapy-induced senescence            | genomic damage   | 3 (1)   | 1 (1)   | 2 (1)   | 1 (0)   |
| SEN (RAS)        | senescent    | lenti-HRAS(G12V) ***            | oncogene-induced senescence                | oncogenic damage | 2 (1)   | nt      | 2 (1)   | nt      |

  

| designation name | phenotype    | genetic alteration           | treatment                                  | damage type    | MCF10A  |
|------------------|--------------|------------------------------|--------------------------------------------|----------------|---------|
|                  |              |                              |                                            |                | (3% O2) |
| PRE              | presenescent | wild type                    | none                                       | undamaged **** | 3 (2)   |
| SEN (XRA)        | senescent    | wild type                    | 10 Gy XRA; radiomimetic-induced senescence | genomic damage | 2 (1)   |
| SEN (ETO)        | senescent    | etoposide-induced senescence | chemotherapy-induced senescence            | genomic damage | 3 (1)   |



**A**

|                                            |                 | activating ligands (i.e. promoting cytotoxicity) |      |        |               |        | inhibitory ligands |       |      |      |      |      |
|--------------------------------------------|-----------------|--------------------------------------------------|------|--------|---------------|--------|--------------------|-------|------|------|------|------|
|                                            |                 | NKG2D-ligands                                    |      |        | DNAM1-ligands |        |                    |       |      |      |      |      |
|                                            |                 | MICA                                             | MICB | ULBP-1 | ULBP-2        | ULBP-3 | CD112              | CD155 | HLAC | HLAE |      |      |
| <i>mRNA expression in WI-38 PRE (n=11)</i> |                 |                                                  |      |        |               |        |                    |       |      |      |      |      |
|                                            | PRE             | 3 & 20 % O2                                      | n=5  | 0.6    | 0.5           | 0.3    | 0.6                | 0.6   | 0.8  | 0.4  | 1.1  | 1.0  |
|                                            | PRE (CON)       | 3% O2                                            | n=4  | 1.1    | 1.2           | 1.0    | 1.1                | 0.9   | 1.1  | 1.3  | 0.9  | 0.9  |
|                                            | PRE (p53-)      | 3% O2                                            | n=2  | 1.7    | 1.5           | 2.4    | 1.5                | 2.3   | 1.2  | 1.5  | 0.9  | 1.4  |
|                                            | SEN (XRA)       | 3 & 20 % O2                                      | n=5  | 29.9   | 24.0          | 11.6   | 9.9                | 3.8   | 5.2  | 24.5 | 3.4  | 3.0  |
|                                            | SEN (REP)       | 3 & 20 % O2                                      | n=4  | 24.9   | 40.0          | 11.3   | 23.1               | 4.7   | 5.0  | 23.4 | 2.6  | 2.9  |
|                                            | SEN (p53- XRA)  | 3% O2                                            | n=2  | 22.8   | 11.5          | 23.2   | 14.8               | 3.2   | 3.5  | 16.5 | 3.1  | 3.2  |
|                                            | SEN (p53- REP)  | 3% O2                                            | n=2  | 37.7   | 16.7          | 40.7   | 32.5               | 5.4   | 5.5  | 35.0 | 3.8  | 4.7  |
|                                            | SEN (XRA> p53-) | 3% O2                                            | n=1  | 43.3   | 16.1          | 22.8   | 31.9               | 5.9   | 5.8  | 35.6 | 2.4  | 3.0  |
|                                            | SEN (REP> p53-) | 3% O2                                            | n=2  | 70.4   | 25.3          | 34.9   | 54.9               | 7.0   | 6.4  | 45.8 | 2.4  | 3.4  |
|                                            | SEN (p16- XRA)  | 3% O2                                            | n=1  | 20.9   | 16.0          | 10.9   | 11.7               | 4.2   | 4.0  | 18.3 | n.t. | n.t. |
|                                            | SEN (p16- REP)  | 20% O2                                           | n=2  | 20.6   | 18.9          | 11.9   | 14.4               | 3.5   | 2.2  | 8.6  | 1.4  | 1.4  |
|                                            | SEN (+p16)      | 3% O2                                            | n=2  | 3.8    | 4.2           | 2.5    | 5.1                | 1.4   | 2.0  | 6.7  | 1.6  | 3.4  |
|                                            | SEN (ATM- XRA)  | 3% O2                                            | n=2  | 4.7    | 3.0           | 6.6    | 3.0                | 1.7   | 1.9  | 3.5  | n.t. | 1.2  |
|                                            | SEN (RAS)       | 3% O2                                            | n=1  | 134.7  | 69.5          | 206.1  | 105.3              | 18.1  | 11.8 | 97.0 | 2.7  | 7.7  |
|                                            | SEN (p53- RAS)  | 3% O2                                            | n=1  | 109.4  | 49.6          | 241.6  | 75.9               | 30.1  | 7.3  | 54.0 | 2.1  | 5.0  |
| <i>mRNA expression in IMR-90 PRE (n=6)</i> |                 |                                                  |      |        |               |        |                    |       |      |      |      |      |
|                                            | PRE             | 3 & 20 % O2                                      | n=3  | 1.0    | 1.0           | 0.8    | 0.9                | 0.6   | 1.3  | 1.3  | 1.5  | 0.7  |
|                                            | PRE (CON)       | 3% O2                                            | n=1  | 0.8    | 1.0           | 0.9    | 0.8                | 1.3   | 0.6  | 0.8  | 0.5  | 1.1  |
|                                            | PRE (p53-)      | 3% O2                                            | n=2  | 1.2    | 1.1           | 1.4    | 1.4                | 1.5   | 0.7  | 0.7  | 0.5  | 1.6  |
|                                            | SEN (XRA)       | 3 & 20 % O2                                      | n=3  | 16.2   | 8.9           | 3.5    | 18.9               | 9.3   | 3.3  | 7.4  | 4.7  | 5.0  |
|                                            | SEN (REP)       | 3% O2                                            | n=2  | 25.4   | 13.7          | 6.5    | 54.5               | 9.2   | 1.7  | 7.4  | 2.1  | 6.2  |
|                                            | SEN (p53- XRA)  | 3% O2                                            | n=2  | 20.0   | 12.5          | 11.0   | 24.0               | 7.4   | 2.4  | 6.3  | 1.9  | 4.1  |
|                                            | SEN (p53- REP)  | 3% O2                                            | n=1  | 22.7   | 13.1          | 8.8    | 39.3               | 8.3   | 2.0  | 6.8  | 2.0  | 5.2  |
|                                            | SEN (+p16)      | 3% O2                                            | n=2  | 2.1    | 3.1           | 2.5    | 3.0                | 1.6   | 1.2  | 2.0  | 1.2  | 3.0  |
|                                            | SEN (+p21)      | 3% O2                                            | n=2  | 3.9    | 3.8           | 2.2    | 5.9                | 3.2   | 0.8  | 1.5  | 1.4  | 1.8  |
|                                            | SEN (RAS)       | 3% O2                                            | n=1  | 60.6   | 33.8          | 48.0   | 78.8               | 28.7  | 2.9  | 14.9 | 1.1  | 5.9  |
|                                            | SEN (p53- RAS)  | 3% O2                                            | n=1  | 41.4   | 20.2          | 43.1   | 78.7               | 14.3  | 2.0  | 9.6  | 1.0  | 4.7  |
| <i>mRNA expression in HCA2 PRE (n=5)</i>   |                 |                                                  |      |        |               |        |                    |       |      |      |      |      |
|                                            | PRE             | 3% O2                                            | n=3  | 1.0    | 1.0           | 0.9    | 1.1                | 0.8   | 1.2  | 1.0  | 1.2  | 0.9  |
|                                            | PRE (p53-)      | 3% O2                                            | n=2  | 1.1    | 1.0           | 1.1    | 0.7                | 1.3   | 0.6  | 0.9  | 0.6  | 1.1  |
|                                            | SEN (XRA)       | 3% O2                                            | n=2  | 8.8    | 5.7           | 1.7    | 3.2                | 1.2   | 1.5  | 2.1  | 1.9  | 1.6  |
|                                            | SEN (REP)       | 3% O2                                            | n=1  | 9.7    | 8.3           | 1.7    | 3.5                | 1.5   | 1.4  | 5.5  | 1.1  | 1.8  |
|                                            | SEN (RAS)       | 3% O2                                            | n=2  | 39.2   | 17.8          | 28.4   | 31.1               | 8.4   | 3.7  | 30.2 | 0.9  | 3.9  |
|                                            | SEN (p53- RAS)  | 3% O2                                            | n=1  | 44.2   | 17.5          | 70.9   | 35.8               | 13.1  | 3.6  | 33.3 | 1.1  | 4.4  |

**B**

|                                            |                 | p16   | p21  | p53  | GAPDH | H1A  |
|--------------------------------------------|-----------------|-------|------|------|-------|------|
| <i>mRNA expression in WI-38 PRE (n=11)</i> |                 |       |      |      |       |      |
|                                            | PRE             | 0.1   | 1.2  | 0.8  | 0.9   | 1.1  |
|                                            | PRE (CON)       | 2.3   | 0.9  | 0.9  | 1.0   | 0.6  |
|                                            | PRE (p53-)      | 0.4   | 0.4  | 2.2  | 1.1   | 1.3  |
|                                            | SEN (XRA)       | 3.0   | 6.8  | 2.9  | 1.9   | 0.2  |
|                                            | SEN (REP)       | 9.8   | 5.2  | 2.9  | 2.3   | 0.2  |
|                                            | SEN (p53- XRA)  | 27.3  | 2.9  | 4.6  | 2.3   | 1.0  |
|                                            | SEN (p53- REP)  | 47.7  | 0.9  | 6.6  | 3.1   | 1.7  |
|                                            | SEN (XRA> p53-) | n.t.  | n.t. | n.t. | n.t.  | n.t. |
|                                            | SEN (REP> p53-) | 105.9 | 1.1  | 5.9  | 2.7   | 1.1  |
|                                            | SEN (p16- XRA)  | n.t.  | n.t. | n.t. | n.t.  | n.t. |
|                                            | SEN (p16- REP)  | 0.1   | 3.3  | 1.2  | 2.6   | 0.6  |
|                                            | SEN (+p16)      | 2922  | 4.8  | 4.6  | 1.4   | 0.5  |
|                                            | SEN (ATM- XRA)  | 151.5 | n.t. | n.t. | n.t.  | n.t. |
|                                            | SEN (RAS)       | 161.0 | 55.3 | 5.7  | 7.5   | 0.2  |
|                                            | SEN (p53- RAS)  | 131.4 | 14.8 | 7.2  | 5.4   | 0.3  |
| <i>mRNA expression in IMR-90 PRE (n=6)</i> |                 |       |      |      |       |      |
|                                            | PRE             | 0.8   | 0.9  | 0.8  | 1.0   | 1.0  |
|                                            | PRE (CON)       | 0.9   | 0.8  | 0.9  | 0.9   | 0.7  |
|                                            | PRE (p53-)      | 1.4   | 0.8  | 1.1  | 1.1   | 1.5  |
|                                            | SEN (XRA)       | 2.2   | 3.3  | 1.0  | 2.4   | 0.7  |
|                                            | SEN (REP)       | 8.0   | 3.1  | 1.6  | 5.1   | 1.0  |
|                                            | SEN (p53- XRA)  | 6.5   | 2.3  | 1.6  | 3.1   | 1.6  |
|                                            | SEN (p53- REP)  | n.t.  | n.t. | n.t. | 4.1   | 1.3  |
|                                            | SEN (+p16)      | 500.6 | 2.5  | 0.7  | 1.5   | 0.6  |
|                                            | SEN (+p21)      | 1.3   | 15.0 | 0.6  | 1.8   | 1.0  |
|                                            | SEN (RAS)       | 32.3  | 13.9 | 1.1  | 6.7   | 0.8  |
|                                            | SEN (p53- RAS)  | 20.9  | 2.5  | 0.8  | 4.5   | 1.5  |
| <i>mRNA expression in HCA2 PRE (n=5)</i>   |                 |       |      |      |       |      |
|                                            | PRE             | 1.0   | 1.3  | 0.9  | 1.0   | 0.9  |
|                                            | PRE (p53-)      | 1.0   | 0.4  | 1.3  | 1.0   | 1.1  |
|                                            | SEN (XRA)       | 2.5   | 4.7  | 1.0  | 1.1   | 1.8  |
|                                            | SEN (REP)       | 0.7   | 6.0  | 2.0  | 1.2   | 5.2  |
|                                            | SEN (RAS)       | 43.7  | 16.8 | 1.9  | 5.8   | 1.4  |
|                                            | SEN (p53- RAS)  | 208.2 | 6.4  | 3.4  | 4.8   | 2.1  |

**C**

|                                            |                 | matrix metallo-proteases (MMP) genomic cluster |       |       |        |       |       |       |      | other extracellular proteases |        |         |       |
|--------------------------------------------|-----------------|------------------------------------------------|-------|-------|--------|-------|-------|-------|------|-------------------------------|--------|---------|-------|
|                                            |                 | MMP1                                           | MMP3  | MMP10 | MMP12  | MMP8  | MMP13 | MMP27 | MMP7 | PDI6A6                        | ADAM17 | MT1-MMP | PSEN1 |
| <i>mRNA expression in WI-38 PRE (n=11)</i> |                 |                                                |       |       |        |       |       |       |      |                               |        |         |       |
|                                            | PRE             | 1.3                                            | 0.8   | 1.6   | 0.3    | 0.6   | 1.3   | 1.3   | 1.2  | 0.6                           | 0.6    | n.t.    | 1.0   |
|                                            | PRE (CON)       | 0.8                                            | 1.6   | 0.6   | 1.5    | 1.5   | 0.6   | 0.5   | 0.4  | 1.2                           | 0.9    | 1.0     | 0.8   |
|                                            | PRE (p53-)      | 1.2                                            | 0.3   | 0.5   | 0.7    | 0.7   | 0.6   | 0.6   | 0.8  | 0.8                           | 1.7    | n.t.    | 1.6   |
|                                            | SEN (XRA)       | 59.6                                           | 244.0 | 21.7  | 195.1  | 12.5  | 2.7   | 2.3   | 1.6  | 3.8                           | 2.6    | 1.5     | 1.9   |
|                                            | SEN (REP)       | 41.1                                           | 169.0 | 11.0  | 114.8  | 3.0   | 1.6   | 0.7   | 1.5  | 3.7                           | 4.5    | n.t.    | 2.8   |
|                                            | SEN (p53- XRA)  | 394.0                                          | 177.6 | 16.1  | 176.5  | 12.0  | 4.5   | 1.8   | 7.4  | 5.0                           | 6.1    | n.t.    | 3.1   |
|                                            | SEN (p53- REP)  | 489.5                                          | 313.1 | 109.7 | 673.1  | 5.9   | 4.4   | 2.4   | 6.7  | 4.1                           | 3.9    | n.t.    | 3.2   |
|                                            | SEN (XRA> p53-) | 8.9                                            | 172.1 | 2.3   | 66.7   | 5.1   | 7.6   | 3.0   | n.d. | n.t.                          | n.t.   | n.t.    | n.t.  |
|                                            | SEN (REP> p53-) | 2.3                                            | 65.8  | 0.8   | 24.8   | 3.2   | 6.1   | 0.7   | n.d. | 4.1                           | n.t.   | n.t.    | n.t.  |
|                                            | SEN (p16- XRA)  | 6.3                                            | 6.0   | 3.0   | 529.2  | 5.5   | 1.6   | 2.3   | 1.1  | n.t.                          | n.t.   | n.t.    | n.t.  |
|                                            | SEN (p16- REP)  | 7.3                                            | 4.9   | 0.2   | 270.9  | 4.5   | 1.8   | 0.7   | 0.7  | 2.7                           | n.t.   | n.t.    | n.t.  |
|                                            | SEN (+p16)      | 17.0                                           | 14.0  | 2.4   | 10.9   | 1.7   | 0.6   | 1.0   | 1.3  | n.t.                          | n.t.   | n.t.    | n.t.  |
|                                            | SEN (ATM- XRA)  | 21.8                                           | 84.8  | 47.7  | 49.1   | 2.2   | n.d.  | n.t.  | n.t. | 1.8                           | 1.9    | 1.6     | 0.9   |
|                                            | SEN (RAS)       | 254.0                                          | 476.2 | 220.3 | 1199.1 | 109.5 | 27.7  | 7.9   | 7.8  | 8.8                           | 9.0    | n.t.    | 11.5  |
|                                            | SEN (p53- RAS)  | 547.1                                          | 494.6 | 120.9 | 1243.3 | 153.7 | 93.6  | 3.3   | n.t. | 7.5                           | 10.1   | n.t.    | 10.7  |
| <i>mRNA expression in IMR-90 PRE (n=6)</i> |                 |                                                |       |       |        |       |       |       |      |                               |        |         |       |
|                                            | PRE             | 0.8                                            | 1.3   | 1.3   | 1.6    | 2.2   | 1.1   | 1.3   | 1.7  | 0.7                           | 0.8    | n.t.    | 1.1   |
|                                            | PRE (CON)       | 0.7                                            | 0.4   | 0.5   | 0.4    | 0.2   | n.d.  | 0.7   | 0.3  | 1.5                           | 0.2    | n.t.    | 0.2   |
|                                            | PRE (p53-)      | 1.8                                            | 1.1   | 0.6   | 0.5    | 0.7   | 0.8   | 0.7   | n.t. | 1.5                           | 2.4    | n.t.    | 1.7   |
|                                            | SEN (XRA)       | 23.3                                           | 22.3  | 4.0   | 8.4    | 0.6   | 3.5   | 0.7   | 0.3  | 3.5                           | 2.6    | n.t.    | 1.9   |
|                                            | SEN (REP)       | 26.2                                           | 318.2 | 13.5  | 91.9   | 1.6   | 1.6   | n.d.  | 4.1  | 8.7                           | 5.7    | n.t.    | 3.5   |
|                                            | SEN (p53- XRA)  | 82.4                                           | 80.1  | 2.3   | 12.8   | 3.7   | 4.8   | n.d.  | 1.0  | 7.0                           | 5.7    | n.t.    | 3.2   |
|                                            | SEN (p53- REP)  | 54.3                                           | 199.2 | 7.9   | 52.3   | 2.6   | 3.2   | n.d.  | 1.5  | n.t.                          | n.t.   | n.t.    | n.t.  |
|                                            | SEN (+p16)      | 10.4                                           | 6.5   | 0.2   | 3.1    | 0.5   | 0.5   | n.d.  | 0.6  | n.t.                          | n.t.   | n.t.    | n.t.  |
|                                            | SEN (+p21)      | 9.1                                            | 5.7   | 0.2   | 1.7    | 0.8   | 0.4   | 0.4   | n.d. | 3.1                           | 2.6    | n.t.    | 1.6   |
|                                            | SEN (RAS)       | 268.2                                          | 772.8 | 975.2 | 278.1  | 41.6  | 13.5  | 2.9   | 13.6 | 12.7                          | 4.8    | n.t.    | 5.6   |
|                                            | SEN (p53- RAS)  | 328.4                                          | 191.8 | 257.3 | 113.8  | 30.5  | 22.1  | 4.0   | n.t. | n.t.                          | n.d.   | n.t.    | n.d.  |
| <i>mRNA expression in HCA2 PRE (n=5)</i>   |                 |                                                |       |       |        |       |       |       |      |                               |        |         |       |
|                                            | PRE             | 0.8                                            | 0.9   | 1.0   | 1.0    | 1.0   | 0.6   | 1.0   | 1.0  | 0.8                           | 0.7    | n.t.    | 0.7   |
|                                            | PRE (p53-)      | 1.5                                            | 1.1   | 0.9   | 1.0    | n.d.  | 1.8   | 1.1   | n.t. | 1.4                           | 1.6    | n.t.    | 1.5   |
|                                            | SEN (XRA)       | 28.7                                           | 20.7  | 11.9  | 19.0   | 2.0   | 2.1   | 2.7   | 5.8  | 2.4                           | 1.5    | n.t.    | 1.3   |
|                                            | SEN (REP)       | 38.5                                           | 17.4  | 6.2   | 21.5   | n.d.  | 4.0   | 1.3   | 4.5  | 4.6                           | 3.4    | n.t.    | 2.9   |
|                                            | SEN (RAS)       | 617.4                                          | 932.1 | 546.4 | 1088   | 49.5  | 17.7  | 4.9   | 26.5 | 11.8                          | 6.9    | n.t.    | 7.7   |
|                                            | SEN (p53- RAS)  | 1102                                           | 1023  | 1456  | 1601   | 156.8 | 43.6  | 27.2  | n.t. | 15.6                          | 8.2    | n.t.    | 9.6   |

1 10 25 50 200 500 1000  
color scale (saturated <1 and >1,000 fold) n.t. = not tested n.d. = not detected

**D**

|                 | CD80    | MICA    | MICB    | ULBP1 | ULBP2  | ULBP3   | MMP1     | MMP3    |
|-----------------|---------|---------|---------|-------|--------|---------|----------|---------|
| WI-38 SEN (XRA) | 3325.68 | 1250.64 | 958.27  | 98.62 | 163.33 | 24.5618 | 10982.29 | 4420.98 |
| WI-38 SEN (REP) | 3112.55 | 1186.11 | 1447.50 | 90.32 | 209.56 | 27.4877 | 8257.81  | 8416.22 |
| PBMC            | 0.052   | 4.541   | 3.444   | 0.039 | 0.534  | 0.094   | 0.433    | n.d.    |

A

B

| human gene name       | Applied Biosystems primers ID | Gene                 | Entrez gene ID | microarray probe set ID | platform U133A | platform U133plus2 |
|-----------------------|-------------------------------|----------------------|----------------|-------------------------|----------------|--------------------|
| h- MICA               | Hs 00792195_m1                | MICA                 | 4276           | 205904_at               | available      | available          |
| h- MICB               | Hs 00792952_m1                | MICA                 | 4276           | 205905_s_at             |                | available*         |
| h- ULBP-1             | Hs 00360941_m1                | MICB                 | 4277           | 205905_s_at             |                | available*         |
| h- ULBP-2             | Hs 00607609_mH                | MICB                 | 4277           | 206247_at               | available      | available          |
| h- ULBP-3             | Hs 00225909_m1                | ULBP1                | 80329          | 221323_at               | available      | available          |
| h- CD112              | Hs 01071562_m1                | ULBP2                | 80328          | 221291_at               | available      | available          |
| h- CD155              | Hs 00197846_m1                | ULBP2                | 80328          | 238542_at               |                | available          |
| h- MMP-1              | Hs 00233958_m1                | ULBP3                | 79465          | 231748_at               |                | available          |
| h- MMP-10             | Hs 00233987_m1                | ULBP4 (RAET1E)       | 135250         | 1552777_a_at            |                | available          |
| h- MMP-12             | Hs 00159178_m1                | ICAM1 (CD54)         | 3383           | 202637_s_at             | available      | available          |
| h- MMP-13             | Hs 00233992_m1                | ICAM1 (CD54)         | 3383           | 202638_s_at             | available      | available          |
| h- MMP-20             | Hs 00191117_m1                | ICAM1 (CD54)         | 3383           | 215485_s_at             | available      | available          |
| h- MMP-27             | Hs 00223193_m1                | MMP1                 | 4312           | 204475_at               | available      | available          |
| h- MMP-3              | Hs 00233962_m1                | MMP3                 | 4314           | 205828_at               | available      | available          |
| h- MMP-7              | Hs 00159163_m1                | MMP10                | 4319           | 205680_at               | available      | available          |
| h- MMP-8              | Hs 00223972_m1                | MMP12                | 4321           | 204580_at               | available      | available          |
| h- H1A                | Hs 00271225_s1                | MMP13                | 4322           | 205959_at               | available      | available          |
| h- ATM                | Hs 01112307_m1                | MMP8                 | 4317           | 207329_at               | available      | available          |
| h- PDIA6 (ERP5)       | Hs 00194922_m1                | MMP8                 | 4317           | 231688_at               |                | available          |
| h- ADAM17             | Hs 00234221_m1                | NGK2D (KLRK1; CD314) | 22914          | 1555691_a_at            |                | available          |
| h- PSEN1              | Hs 00997789_m1                | NGK2D (KLRK1; CD314) | 22914          | 1555692_at              |                | available          |
| h- MT1MMP (MMP-14)    | Hs 00237119_m1                | NGK2D (KLRK1; CD314) | 22914          | 205821_at               | available      | available          |
| h- Cathepsin B (CSTB) | Hs 00157194_m1                | CDB (CD8A)           | 925            | 205758_at               | available      | available          |
| h- NKG2D (KLRK1)      | Hs 01095635_m1                | CDB (CD8A)           | 925            | 205759_s_at             |                | available          |
| h- CD56 (NCAM1)       | Hs 00941833_m1                | CD94 (KLRD1)         | 3824           | 207795_s_at             | available      | available          |
| h- CD8                | Hs 01555600_m1                | CD94 (KLRD1)         | 3824           | 207796_x_at             | available      | available          |
| h- CD94               | Hs 00233841_m1                | CD94 (KLRD1)         | 3824           | 210606_x_at             | available      | available          |
| h- CD14               | Hs 00169122_m1                | CD57 (HNK1; B3GAT1)  | 27087          | 219521_at               | available      | available          |
| h- CD1a               | Hs 00233332_m1                | CD56 (NCAM1)         | 4684           | 209968_s_at             | available      | available          |
| h- CD45               | Hs 00236304_m1                | CD56 (NCAM1)         | 4684           | 209969_s_at             |                | available          |
| h- CD10               | Hs 00153510_m1                | CD56 (NCAM1)         | 4684           | 212843_at               | available      | available          |
| h- CD90 (THY-1)       | Hs 00174816_m1                | CD56 (NCAM1)         | 4684           | 214952_at               | available      | available          |
|                       |                               | CD56 (NCAM1)         | 4684           | 217359_s_at             | available      | available          |
|                       |                               | CD56 (NCAM1)         | 4684           | 214952_at               |                | available          |
|                       |                               | CD56 (NCAM1)         | 4684           | 227394_at               |                | available          |
|                       |                               | CD56 (NCAM1)         | 4684           | 227395_at               |                | available          |
|                       |                               | CD56 (NCAM1)         | 4684           | 229799_s_at             |                | available          |
|                       |                               | CD56 (NCAM1)         | 4684           | 231532_at               |                | available          |
|                       |                               | p16 (CDKN2A; INK4A)  | 1029           | 207039_at               | available      | available          |
|                       |                               | p16 (CDKN2A; INK4A)  | 1029           | 209644_x_at             | available      | available          |
|                       |                               | p16 (CDKN2A; INK4A)  | 1029           | 211166_at               | available      | available          |
|                       |                               | p21 (CDKN1A; WAF1)   | 1026           | 1555186_at              |                | available          |
|                       |                               | p21 (CDKN1A; WAF1)   | 1026           | 1555187_at              |                | available          |
|                       |                               | p21 (CDKN1A; WAF1)   | 1026           | 202284_s_at             | available      | available          |
|                       |                               | IL6                  | 3569           | 205207_at               | available      | available          |
|                       |                               | IL7                  | 3574           | 206693_at               | available      | available          |
|                       |                               | IL8 (CXCL8)          | 3576           | 202859_x_at             | available      | available          |
|                       |                               | IL8 (CXCL8)          | 3576           | 211506_s_at             | available      | available          |
|                       |                               | GROa (CXCL1)         | 2919           | 204470_at               | available      | available          |
|                       |                               | GM-CSF (CSF2)        | 1437           | 210228_at               | available      | available          |
|                       |                               | GM-CSF (CSF2)        | 1437           | 210229_s_at             | available      | available          |
|                       |                               | GM-CSF (CSF2)        | 1437           | 210230_at               | available      | available          |
|                       |                               | IGFBP2               | 3485           | 202718_at               | available      | available          |
|                       |                               | IL1B                 | 3553           | 205067_at               | available      | available          |
|                       |                               | IL1B                 | 3553           | 39402_at                | available      | available          |
|                       |                               | CyclinA (CCNA1)      | 8900           | 205899_at               | available      | available          |
|                       |                               | MCM3                 | 4172           | 201555_at               | available      | available          |
|                       |                               | PCNA                 | 5111           | 201202_at               | available      | available          |
|                       |                               | IL2                  | 3558           | 207849_at               | available      | available          |
|                       |                               | Ki67 (MKI67)         | 4288           | 212020_s_at             | available      | available          |
|                       |                               | Ki67 (MKI67)         | 4288           | 212021_s_at             | available      | available          |
|                       |                               | Ki67 (MKI67)         | 4288           | 212022_s_at             | available      | available          |
|                       |                               | Ki67 (MKI67)         | 4288           | 212023_s_at             | available      | available          |
|                       |                               | MMP14 (MT1-MMP)      | 4323           | 160020_at               | available      | available          |
|                       |                               | MMP14 (MT1-MMP)      | 4323           | 202827_s_at             | available      | available          |
|                       |                               | MMP14 (MT1-MMP)      | 4323           | 202828_s_at             | available      | available          |
|                       |                               | MMP14 (MT1-MMP)      | 4323           | 217279_x_at             | available      | available          |
|                       |                               | Erp5 (PDIA6)         | 10130          | 207668_x_at             | available      | available          |
|                       |                               | Erp5 (PDIA6)         | 10130          | 207669_at               |                | available          |
|                       |                               | Erp5 (PDIA6)         | 10130          | 207670_at               |                | available          |
|                       |                               | Erp5 (PDIA6)         | 10130          | 208638_at               | available      | available          |
|                       |                               | Erp5 (PDIA6)         | 10130          | 208639_x_at             | available      | available          |
|                       |                               | Erp5 (PDIA6)         | 10130          | 216640_s_at             | available      | available          |

  

| human gene name | forward & reverse sequences (5' - 3')          |
|-----------------|------------------------------------------------|
| h- p16          | CCAACGCACCGAATAGTTACG<br>GGGCGCTGCCCATCA       |
| h- p21          | TGGAGACTCTCAGGGTCGAAA<br>AGGACTGCAGGCTTCCTGTG  |
| h- p53          | CCCAAGCAAGAAAGAAACCA<br>CTCGGAACAATCTCGAAGCG   |
| h- GUS          | CTCATTTGGAATTTGCCGATT<br>CCGAGTGAAGATCCCTTTTTA |
| h- GAPDH        | ATTCACCCATGGCAAATTC<br>TGGGATTCATTGATGACAAAG   |

\* = probe overlap over two genes &amp; data excluded

**A**

| Study ID                  | Included after bias analysis               |
|---------------------------|--------------------------------------------|
| E-TABM-43                 | yes; to study effects of chemotherapy      |
| GSE10281                  | no                                         |
| GSE11264                  | no                                         |
| GSE12787                  | no                                         |
| GSE1378 / GSE1379         | no                                         |
| GSE13787                  | yes; to study effects of endocrine therapy |
| GSE1456                   | no                                         |
| GSE16391                  | yes; to study effects of endocrine therapy |
| GSE16446                  | yes; to study effects of endocrine therapy |
| GSE16680                  | no                                         |
| GSE17705                  | no                                         |
| GSE17705                  | no                                         |
| GSE18728                  | no                                         |
| GSE18864                  | no                                         |
| GSE20194                  | yes; to study effects of chemotherapy      |
| GSE20194                  | no                                         |
| GSE20271                  | no                                         |
| GSE2034                   | no                                         |
| GSE21653                  | no                                         |
| GSE22035                  | yes; to study effects of endocrine therapy |
| GSE22093                  | no                                         |
| GSE23399                  | no                                         |
| GSE23988                  | yes; to study effects of chemotherapy      |
| GSE25066                  | no                                         |
| GSE3494                   | no                                         |
| GSE4056                   | no                                         |
| GSE61 / E-SMDB-4          | no                                         |
| GSE6434 / GSE349 / GSE350 | no                                         |
| GSE6577                   | no                                         |
| GSE6861                   | no                                         |
| GSE7515                   | no                                         |

**B**

| Study ID | Included after bias analysis |
|----------|------------------------------|
| GSE1133  | no                           |
| GSE19234 | no                           |
| GSE22138 | no                           |
| GSE2361  | no                           |
| GSE2503  | no                           |
| GSE3189  | yes                          |
| GSE4587  | no                           |
| GSE7553  | no                           |
